# Supplementary material for: Knockdown of long noncoding RNA SAN rejuvenates aged adipose-derived stem cells via miR-143-3p/ADD3 axis
Source: PubMed Central journal article supplement (PMC10441736; doi:10.1186/s13287-023-03441-1), 2023-08-21
Supplement: 13287_2023_3441_MOESM1_ESM.pdf [file 13287_2023_3441_MOESM1_ESM.pdf]

**Table S1.** Basic characteristics of different groups included in the study.

| Variables      | Young donators | Old donators  | P value (Y/O) |
|----------------|----------------|---------------|---------------|
| Number         | 14             | 15            | NA            |
| Age            | 8.14 ± 2.82    | 54.20 ± 3.82  | <0.0001****   |
| Prefemoral fat | 11             | 11            | NA            |
| Abdominal fat  | 3              | 4             | NA            |
| BMI            | 19.13 ± 3.57   | 22.02 ± 2.61  | 0.04*         |
| SBP            | 115 ± 11.67    | 126.54 ± 8.30 | 0.03*         |
| DBP            | 75 ± 7.39      | 80 ± 6.15     | 0.14          |
| FBG            | 4.87 ± 0.35    | 5.00 ± 0.69   | 0.60          |
| TG             | 1.15 ± 0.43    | 1.53 ± 0.46   | 0.29          |
| TC             | 3.68 ± 0.53    | 4.44 ± 0.80   | 0.20          |
| HDL            | 1.23 ± 0.18    | 1.19 ± 0.31   | 0.83          |
| LDL            | 1.98 ± 0.55    | 2.65 ± 0.71   | 0.01*         |
| Cr             | 36.5 ± 5.00    | 51.08 ± 16.26 | 0.02*         |
| BUN            | 3.89 ± 1.16    | 4.13 ± 0.87   | 0.40          |

BMI (kg/m<sup>2</sup>): body mass index; SBP (mm Hg): systolic blood pressure; DBP (mm Hg): diastolic blood pressure; FBG (mmol/L): fasting blood glucose; TG (mmol/L): triglyceride; TC (mmol/L): total cholesterol; HDL-C (mmol/L): high-density lipoprotein cholesterol; LDL-C (mmol/L): low-density lipoprotein cholesterol; Cr (μmol/L): creatinine; BUN (mmol/L): blood urea nitrogen. Data are expressed as Mean ± SEM and were statistically analyzed by the un-paired Student's t test. \*p< 0.05, \*\*p< 0.01.

**Table S2.** RNAs' primers used for real-time polymerase chain reaction.

| Gene            | Primer sequences                                                             |
|-----------------|------------------------------------------------------------------------------|
| NONHSAT035482.2 | Forward 5'-CGCAGTCTTGGATGATGGGTTC-3'<br>Reverse 5'-GCTCCAGCTACTTTGGGGCTTA-3' |
| ADD3            | Forward 5'-TTCACCTCCTCTCAGTCTTGGC-3'<br>Reverse 5'-GTGTGCCCATCCAAACAAGTC-3'  |
| VEGFA           | Forward 5'-GTTCGAGGAAAGGGAAAGGGGC-3'<br>Reverse 5'-TGAGCAAGGCCACAGGGAAC-3'   |
| FGF2            | Forward 5'-GAGAAGAGCGACCCTCACATCA-3'<br>Reverse 5'-TGCCCAGTTCGTTTCAGTGCC-3'  |
| U3              | Forward 5'-TGTAGAGCACCGAAAACCACG-3'<br>Reverse 5'-CAGCCAAGCAACGCCAGA-3'      |
| GAPDH           | Forward 5'-AAAATCAAGTGGGGCGATGCT-3'<br>Reverse 5'-TGGTTCACACCCATGACGAAC-3'   |
| $\beta$ -ACTIN  | Forward 5'-CAGCCTTCCTTCCTGGGCAT-3'<br>Reverse 5'-GGGCAGTGATCTCCTTCTGCAT-3'   |
| hsa-miR-143-3p  | Forward 5'-TGAGATGAAGCACTGTAGCTC-3'                                          |
| U6              | Forward 5'-CTCGCTTCGGCAGCACA-3'<br>Reverse 5'-AACGCTTCACGAATTTGCGT-3'        |

**Table S3.** Sequences of mimics, inhibitors.

|                          | Sequences                                                    |
|--------------------------|--------------------------------------------------------------|
| hsa-miR-143-3p mimic     | 5'-UGAGAUGAAGCACUGUAGCUC-3'<br>3'-ACUCUACUUCGUGACAUCGAG-5'   |
| mimic NC                 | 5'-UUUGUACUACACAAAAGUACUG-3'<br>3'-AAACAUGAUGUGUUUUCAUGAC-5' |
| hsa-miR-143-3p inhibitor | 5'-GAGCUACAGUGCUUCAUCUCA-3'                                  |
| inhibitor NC             | 5'-CAGUACUUUUGUGUAGUACAAA-3'                                 |

**Table S4.** Target sequences of lentiviral vector containing shRNA.

| Gene      | Target sequences              |
|-----------|-------------------------------|
| sh-SAN#1  | 5'- GCTCTCAACATCTCTTCTT -3'   |
| sh-SAN#2  | 5'- GCAGGAACTTGATTACTTT -3'   |
| sh-SAN#3  | 5'- GCAACTTTGTTCAACATTA -3'   |
| sh-ADD3#1 | 5'- GCTGTATCCTCCATGAAAT -3'   |
| sh-ADD3#2 | 5'- GCCACCTTCTACTATGCAA -3'   |
| sh-ADD3#3 | 5'- GCTCCTCCTAACCCATTA -3'    |
| sh-NC     | 5'- CCTAAGGTTAAGTCGCCCTCG -3' |

**Table S5.** The gene-specific primers used for the RACE analysis of NONHSAT035482.2.

| Gene Specific Primers | Sequences                            |
|-----------------------|--------------------------------------|
| 5'RACE GSP            |                                      |
| Out Primer            | 5'- ACAGTGGCAGAAGAAGTCCAGCAAGG -3''  |
| Inner Primer          | 5'- GGAACCCATCATCCAAGACTGCGGCAC -3'' |
| 3'RACE GSP            |                                      |
| Out Primer            | 5'- AGGAGGCAGGTCTCCGCGGTTTCATCT -3'' |
| Inner Primer          | 5'- TGCCGCAGTCTTGGATGATGGGTTCC -3''  |

**Figure S1**

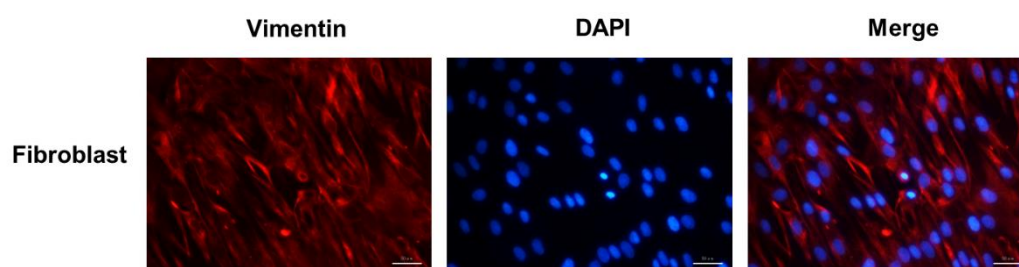

Figure S1. Identification of fibroblast. Images of vimentin-stained cells (red) in fibroblast; nuclei were stained blue. Scale bar = 50  $\mu$ m.

Figure S2

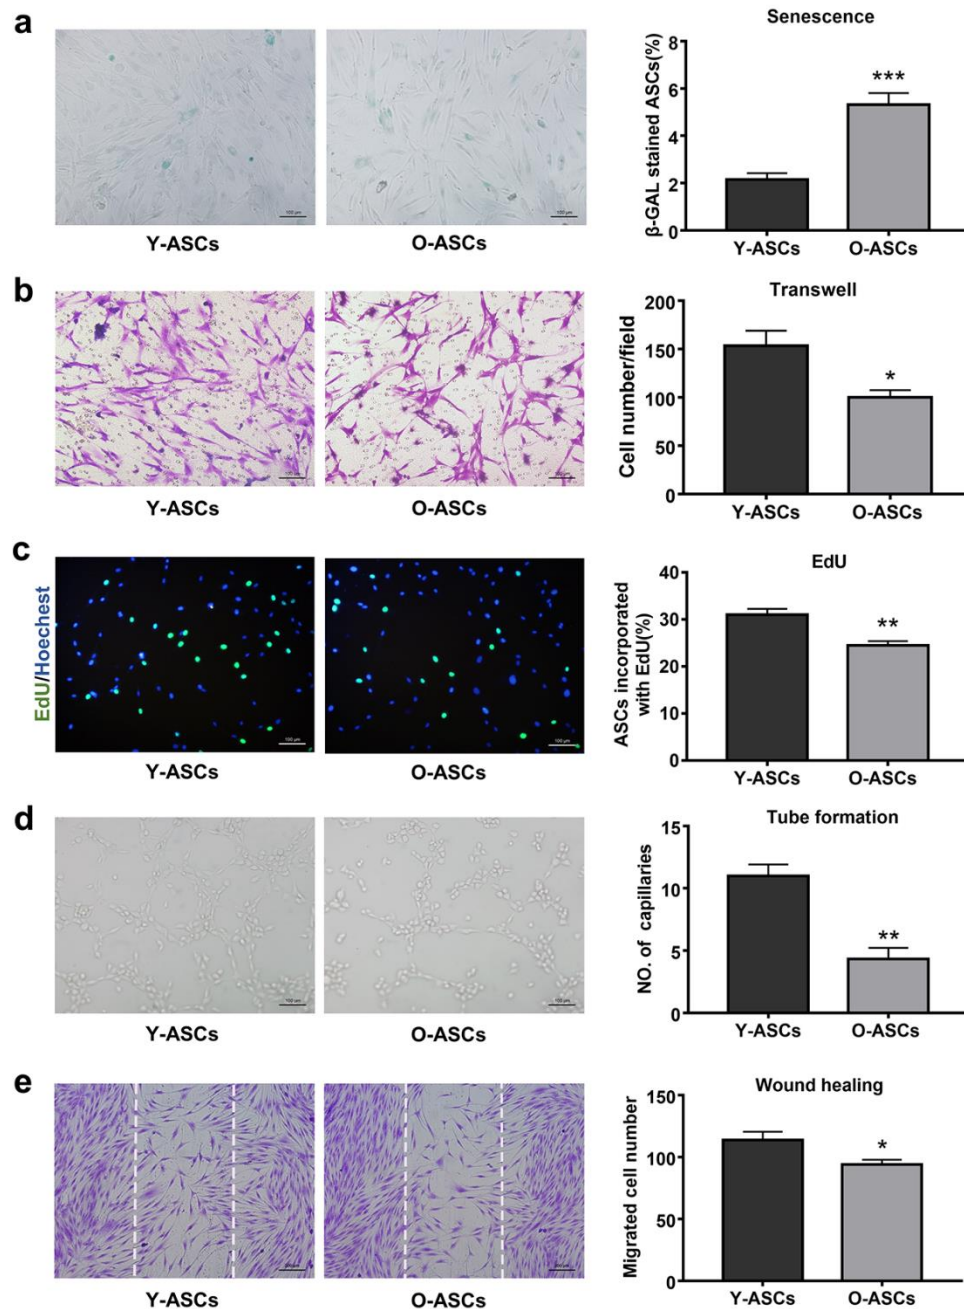

Figure S2. Evaluation of the cellular function of ASCs obtained from old and young volunteer donors. (a) Representative images of SA-β-gal staining and quantitative analysis of SA-β-gal-positive cells in Y-ASCs and O-ASCs. Scale bar = 100 μm. (b) Images and quantitative analysis of migrated cells in Y-ASCs and O-ASCs. Scale bar = 100 μm. (c) Representative images of EdU-stained cells (green) in ASCs and analysis of proliferative rate in those two groups; nuclei were stained blue. Scale bar = 100 μm. (d) Images of tube formation and quantitative analysis of capillaries in HUVECs treated with CM from Y-ASCs and O-ASCs. Scale bar = 100 μm. (e) Images and quantitative analysis of migrated fibroblasts that received the above treatments. Scale bar = 200 μm. All experiments were performed in triplicate (n = 5. \*p < 0.05, \*\*p < 0.01, \*\*\*p < 0.001).

Figure S3

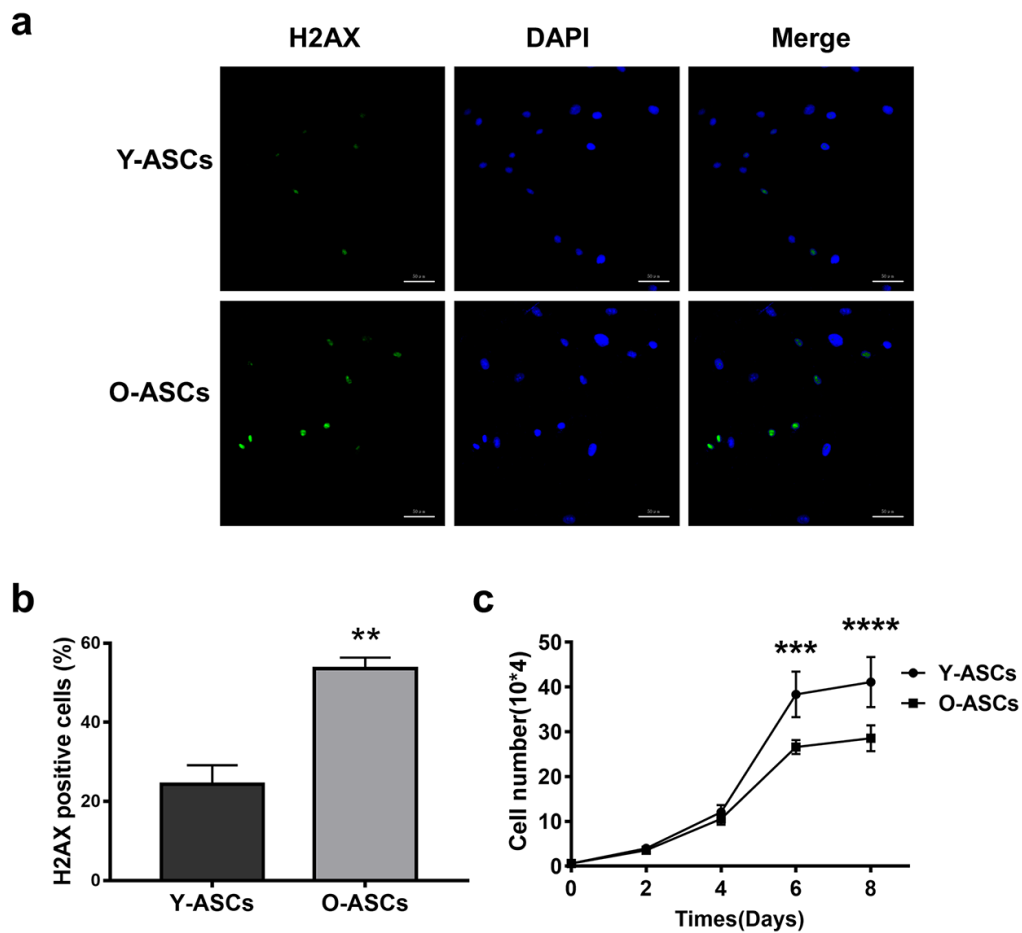

Figure S3. Evaluation of the cellular senescence and proliferation of ASCs obtained from old and young volunteer donors. (a) Representative images of H2AX stained cells (green) in Y-ASCs and O-ASCs; nuclei were stained blue. (b) Quantitative analysis of H2AX positive cells rates in Y-ASCs and O-ASCs. (c) Cell growth curves of O-ASCs and Y-ASCs. Scale bar = 50  $\mu$ m. All experiments were performed in triplicate (n = 4. \*p < 0.05, \*\*p < 0.01, \*\*\*p < 0.001, \*\*\*\*p < 0.0001).

Figure S4

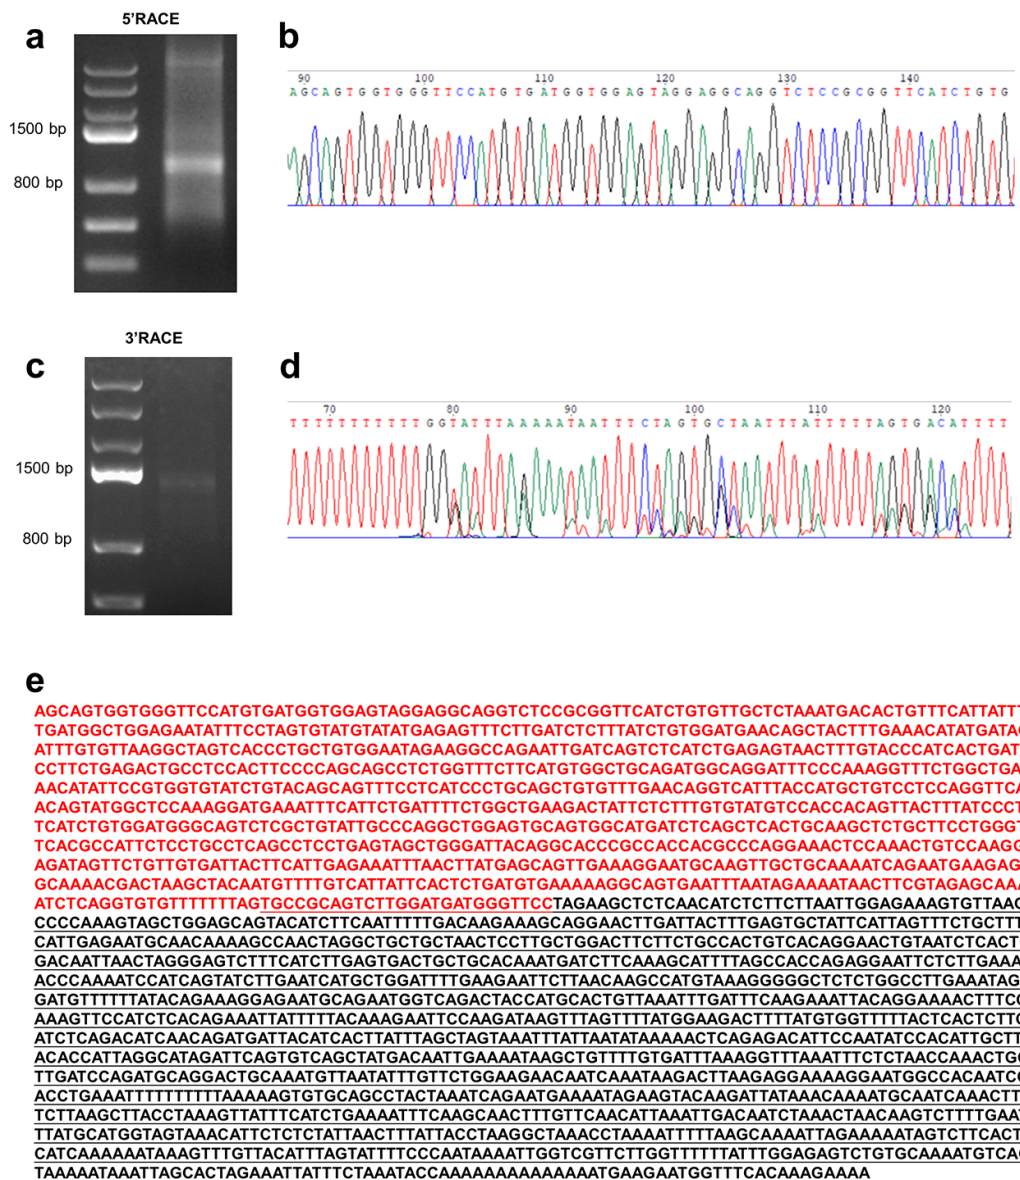

Figure S4. Sequence structure of NONHSAT035482.2. (a, b) 5'-RACE and 3'-RACE were conducted to harvest the 5'-end and 3'-end cDNA sequences of NONHSAT035482.2. (c, d) Amplicons were then sequenced. (e) The nucleotide sequence of the full-length NONHSAT035482.2 is shown red zone and underlined bases are the region of 5'-end (942 bp) and 3'-end (1301 bp) nucleotide sequences, respectively. A polyadenylation sequence was detected at the 3'-end of NONHSAT035482.2.

Figure S5

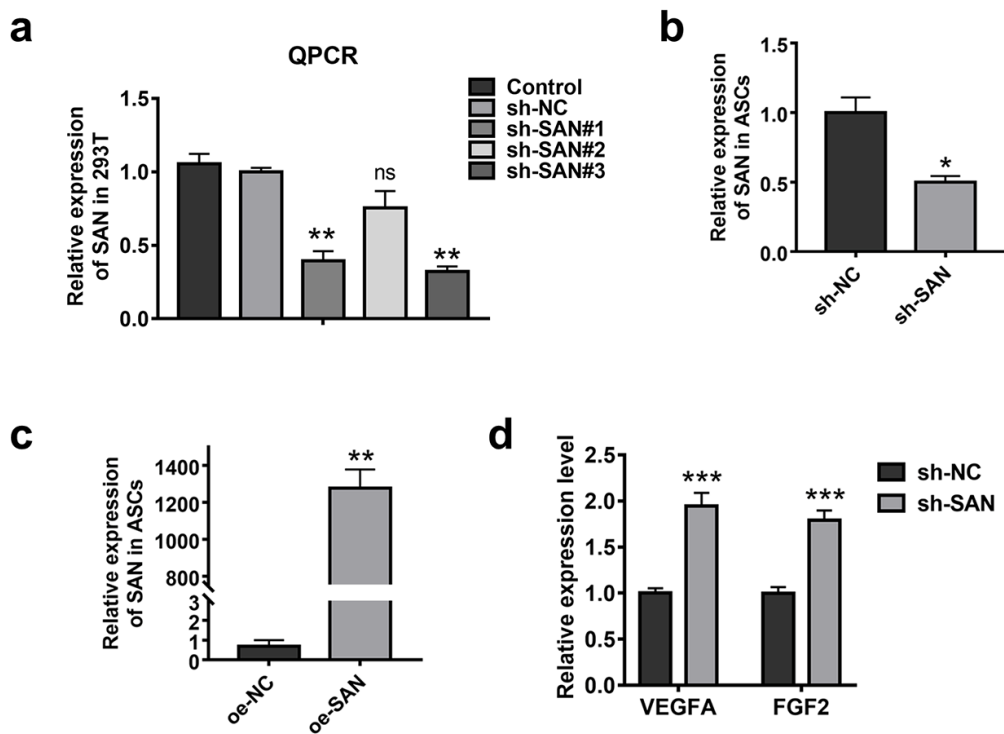

Figure S5. Examination of sh-SAN and oe-SAN vector efficiencies. (a) The expression of SAN in HEK-293T cells after transfection with sh-SAN plasmids. (b) qPCR analysis of SAN expression in ASCs transduced sh-SAN or sh-NC. (c) qPCR analysis of SAN expression in ASCs transduced oe-SAN or oe-NC. (d) qPCR analysis of the expression of vascular endothelial growth factor and fibroblast growth factor in ASCs transduced with sh-SAN or sh-NC. All experiments were performed in triplicate (n = 3. \*p < 0.05, \*\*p < 0.01, \*\*\*p < 0.001).

Figure S6

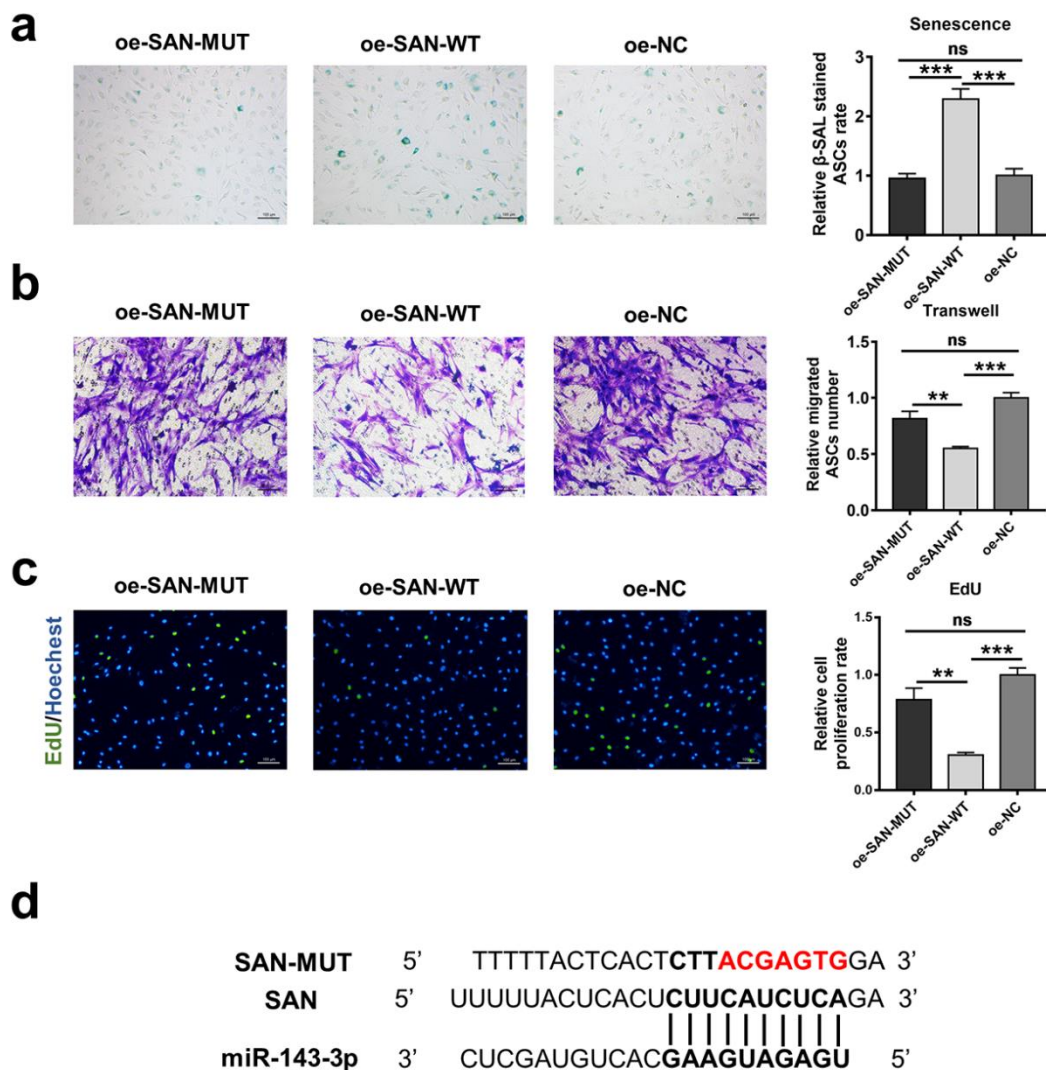

Figure S6. (a)  $\beta$ -gal staining and quantitative analysis of SA- $\beta$ -gal-positive cells were detected in ASCs that had been stably transduced with SAN mutant type vector, SAN wild type or NC. Scale bar = 100  $\mu$ m. (b) Images of migrated cells and quantitative analysis of ASCs that had been stably transduced with SAN mutant type vector, SAN wild type or NC. Scale bar = 100  $\mu$ m. (c) Representative images and quantitative analysis of EdU-stained cells (green) in ASCs that received the above treatment; nuclei were stained blue. Scale bar = 100  $\mu$ m. (d) Mutations in the sequence of SAN mutant type vector. All experiments were performed in triplicate (n = 3. \*p < 0.05, \*\*p < 0.01, \*\*\*p < 0.001).



**Figure S7**

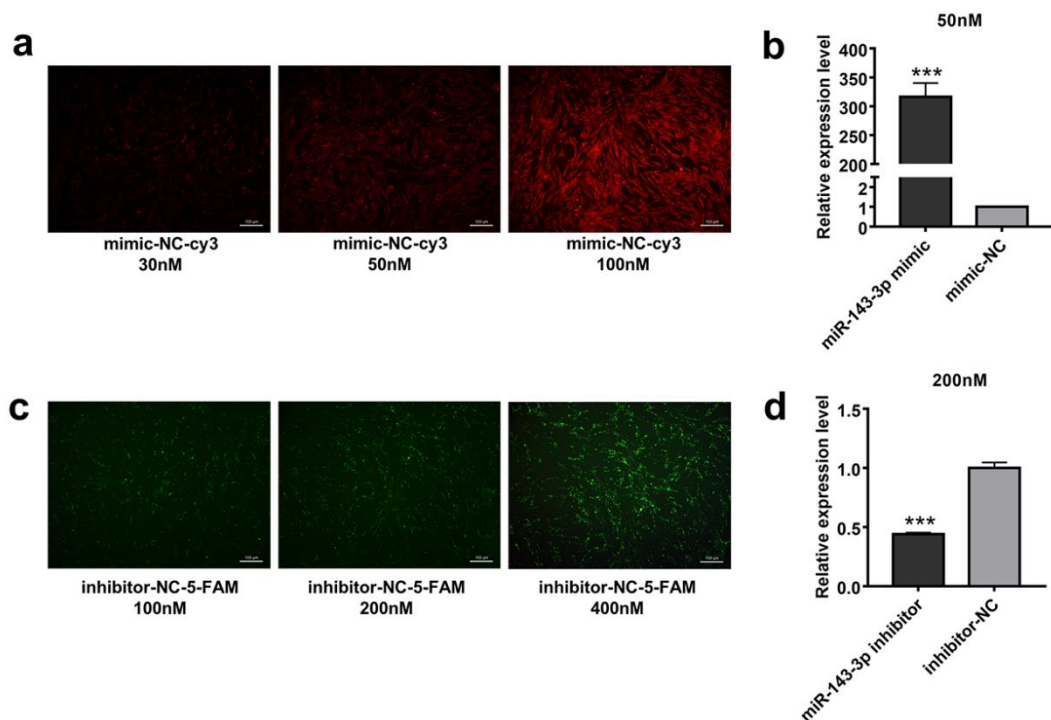

Figure S7. Examination of mimic and inhibitor transfection efficiencies. (a) Representative images of ASCs treated with mimic-NC labeled with cy3 (red) in different concentration. Scale bar = 100  $\mu$ m. (b) qPCR was conducted to detect miR-143-3p expression in ASCs transfected with 50nM miR-143-3p mimic. (c) Representative images of ASCs treated with inhibitor-NC labeled with 5-FAM (green) in different concentration. Scale bar = 100  $\mu$ m. (d) qPCR was conducted to detect miR-143-3p expression in ASCs transfected with 200nM miR-143-3p inhibitor. All experiments were performed in triplicate (n = 3. \*\*\*p < 0.001).

**Figure S8**

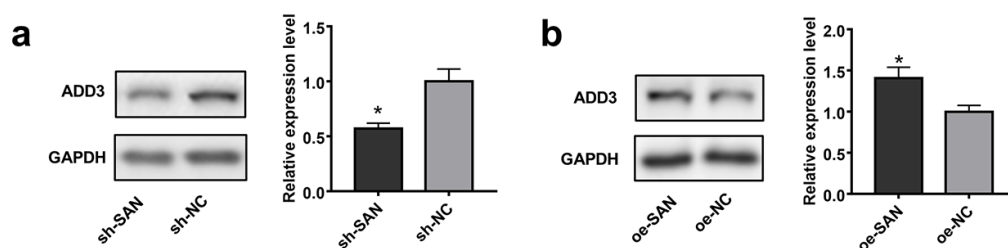

Figure S8. SAN knockdown or overexpression could reduce or accelerate ADD3 expression. (a) Western blotting and quantitative analysis of the expression levels of ADD3 in ASCs transduced with sh-SAN or sh-NC. (b) Western blotting and quantitative analysis of the expression levels of ADD3 in ASCs transduced with NC vector or SAN. All experiments were performed in triplicate (n = 3. \*p < 0.05).

Figure S9

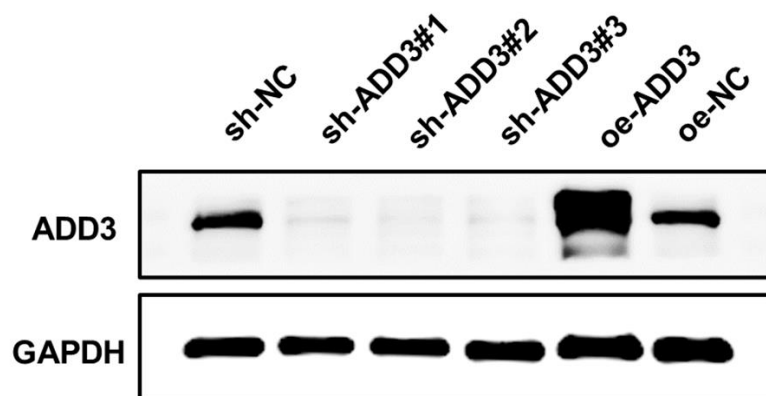

Figure S9. Examination of sh-ADD3 and oe-ADD3 vector efficiencies. Western blotting analysis of the expression levels of ADD3 in ASCs transduced with sh-ADD3 or sh-NC and oe-ADD3 or oe-NC.

Figure S10

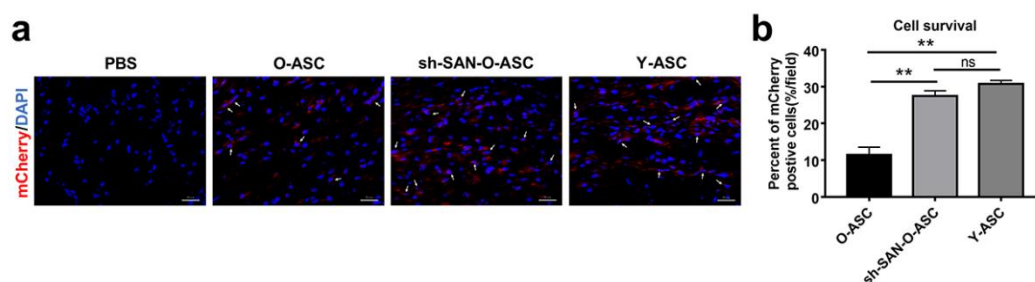

Figure S10. SAN knockdown promotes ASC survival. (a) Representative images of wound sections that underwent injection of PBS, Y-ASCs, O-ASCs, or sh-SAN-O-ASCs at day 14 post-wounding. Cell nuclei (DAPI) were stained blue. Survival of implanted cells was detected by mCherry (red) expression and DAPI (blue) staining in the subcutaneous region of the wound; non-specific fluorescent staining was excluded. Arrows indicate surviving ASCs. Scale bar, 50  $\mu$ m. (b) Enumeration of surviving ASCs. All experiments were performed in triplicate (n = 4–5. \*\*p < 0.01, ns, not significant).
