# Supplementary material for: Knockdown of long noncoding RNA SAN rejuvenates aged adipose-derived stem cells via miR-143-3p/ADD3 axis
Source: PubMed Central journal article supplement (PMC10441736; doi:10.1186/s13287-023-03441-1), 2023-08-21

Original blots: repeat 1 was used in formal figures

Three replicative experiments in Figure 1i&j

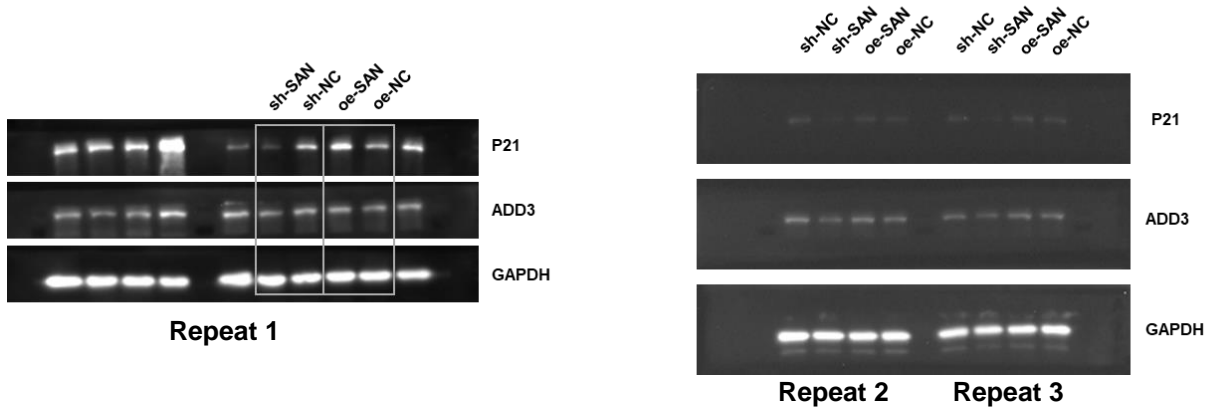

Three replicative experiments in Figure 3f

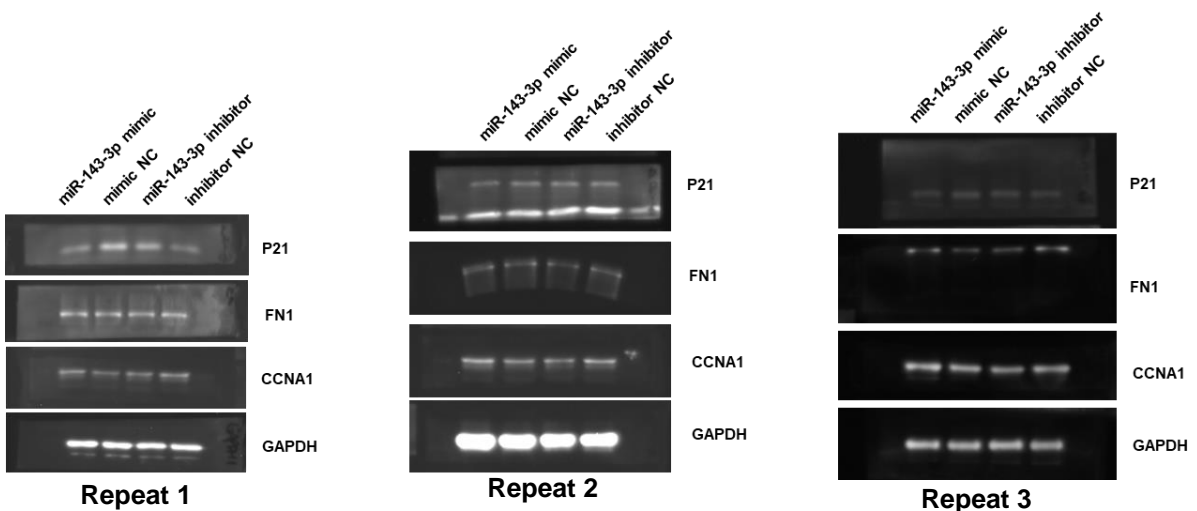

Three replicative experiments in Figure 4f

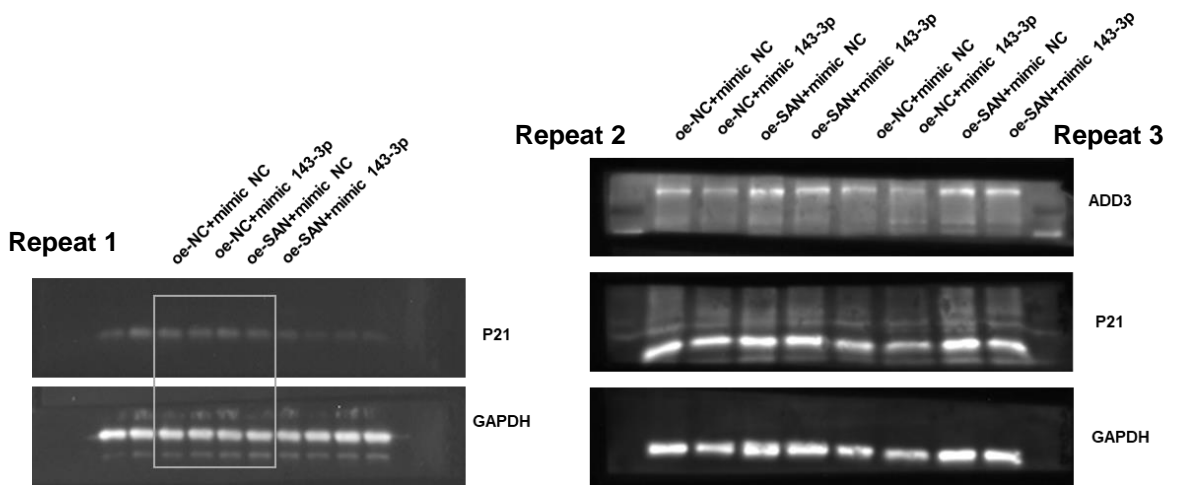

### Three replicative experiments in Figure 5g

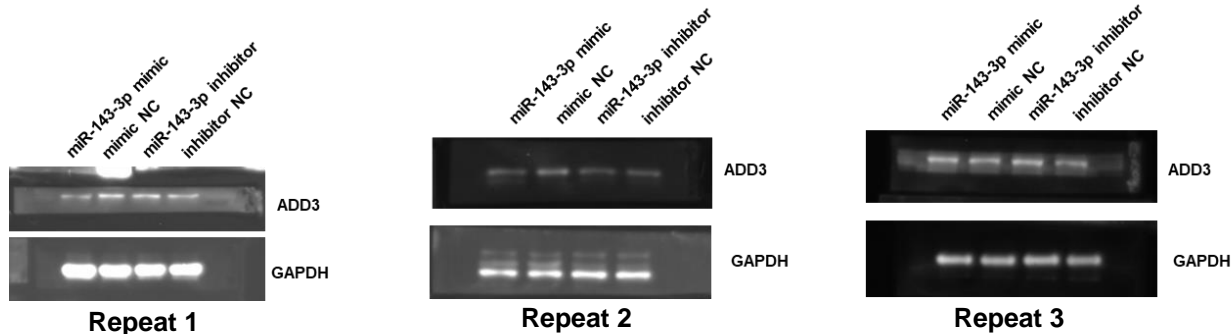

### Three replicative experiments in Figure 6f

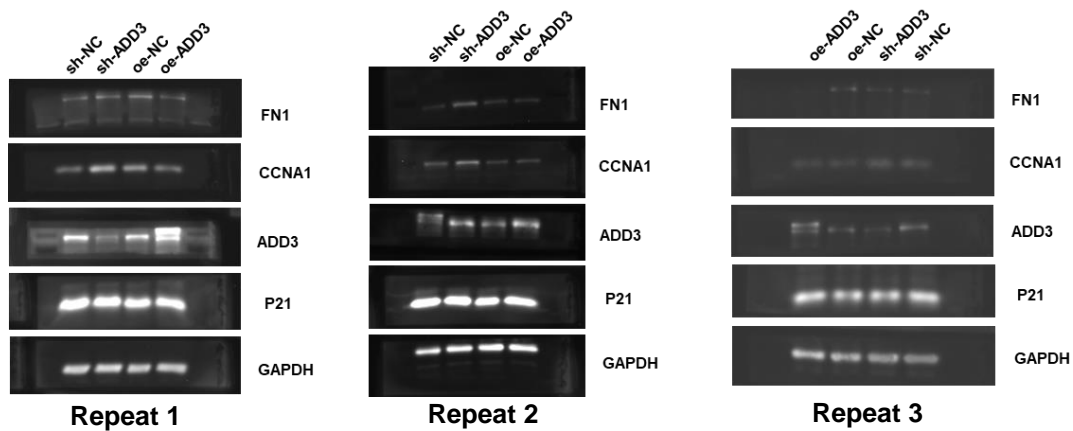

### Three replicative experiments in Figure 7f

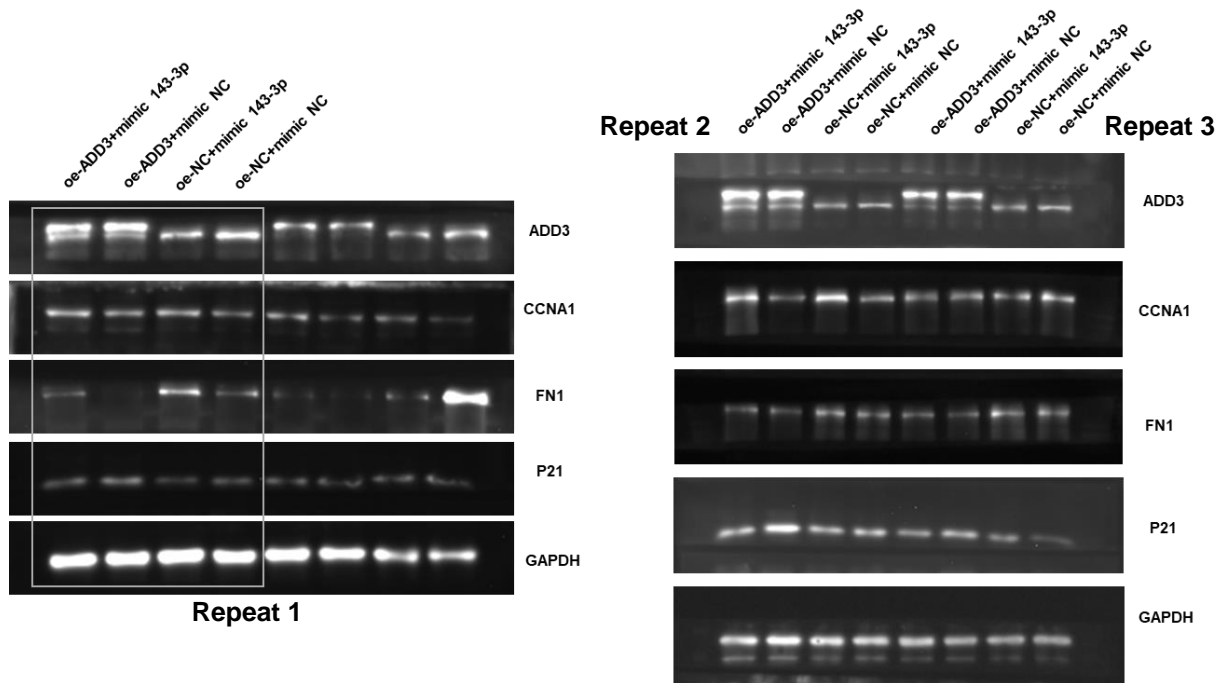

Figure 5h

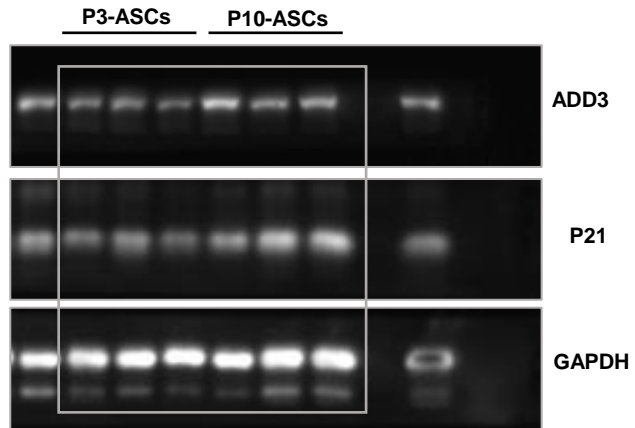

Figure 5j

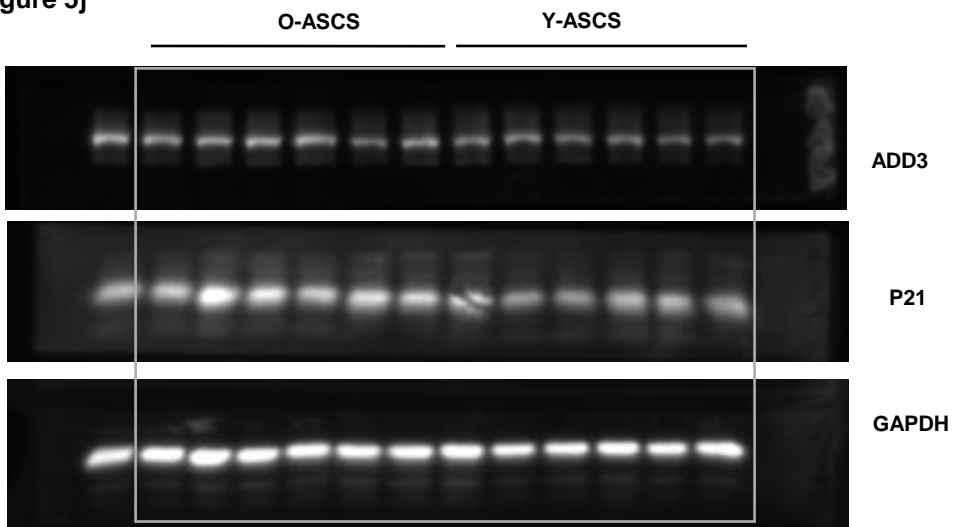

Supplement: 13287_2023_3441_MOESM4_ESM.pdf [file 13287_2023_3441_MOESM4_ESM.pdf]
